# Supplementary material for: Bio-Inspired Hierarchical Micro-/Nanostructures for Anti-Icing Solely Fabricated by Metal-Assisted Chemical Etching
Source: MDPI journal article supplement (doi:10.3390/mi13071077), 2022-07-07
Supplement: s1 [file s1]

Supplementary Material

# Bio-Inspired Hierarchical Micro-/Nanostructures for Anti-Icing Solely Fabricated by Metal-Assisted Chemical Etching

Lansheng Zhang <sup>1</sup>, Xiaoyang Chu <sup>1</sup>, Feng Tian <sup>1,2</sup>, Yang Xu <sup>2</sup> and Huan Hu <sup>1,3,\*</sup>

<sup>1</sup> ZJU-UIUC Institute, International Campus, Zhejiang University, Haining 314400, China; lansheng.20@intl.zju.edu.cn (L.Z.); xiaoyang.20@intl.zju.edu.cn (X.C.); tianfeng@zju.edu.cn (F.T.)

<sup>2</sup> School of Micro-Nano Electronics, Zhejiang University, Hangzhou 310000, China; yangxu-isee@zju.edu.cn

<sup>3</sup> State Key Laboratory of Fluid Power and Mechatronic Systems, Zhejiang University, Hangzhou 310000, China

\* Correspondence: huanhu@intl.zju.edu.cn

**Citation:** Zhang, L.; Chu, X.; Tian, F.; Xu, Y.; Hu, H. Bio-Inspired Hierarchical Micro-/Nanostructures for Anti-Icing Solely Fabricated by Metal-Assisted Chemical Etching. *Micromachines* **2022**, *13*, 1077. <https://doi.org/10.3390/mi13071077>

Academic Editor: Lucia Romano

Received: 19 June 2022

Accepted: 5 July 2022

Published: 7 July 2022

**Publisher's Note:** MDPI stays neutral with regard to jurisdictional claims in published maps and institutional affiliations.

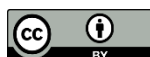

**Copyright:** © 2022 by the authors. Submitted for possible open access publication under the terms and conditions of the Creative Commons Attribution (CC BY) license (<https://creativecommons.org/licenses/by/4.0/>).

**Table S1.** Different methods to form hierarchical micro/nanostructured surfaces.

| Literature Reports                          | Microstructure Fabrication                          | Nanostructure Fabrication                           |
|---------------------------------------------|-----------------------------------------------------|-----------------------------------------------------|
| Nanosecond pulsed laser irradiation [1]     | Nanosecond pulsed laser irradiation                 | Nanosecond pulsed laser irradiation                 |
| Femtosecond [2]                             | Femtosecond                                         | Hydrothermal treatments                             |
| Nanoimprinting [3]                          | Nanoimprinting with a microtemplate                 | Nanoimprinting                                      |
| Hot-embossing [4]                           | Hot-embossing                                       | Hot-embossing                                       |
| Laser scanning probe lithography [5]        | Scanning probe lithography and wet chemical etching | Scanning probe lithography and wet chemical etching |
| Glancing angle deposition [6]               | Deep reactive ion etching                           | Glancing angle deposition                           |
| Metal-assisted chemical etching (this work) | Metal-assisted chemical etching                     | Metal-assisted chemical etching                     |

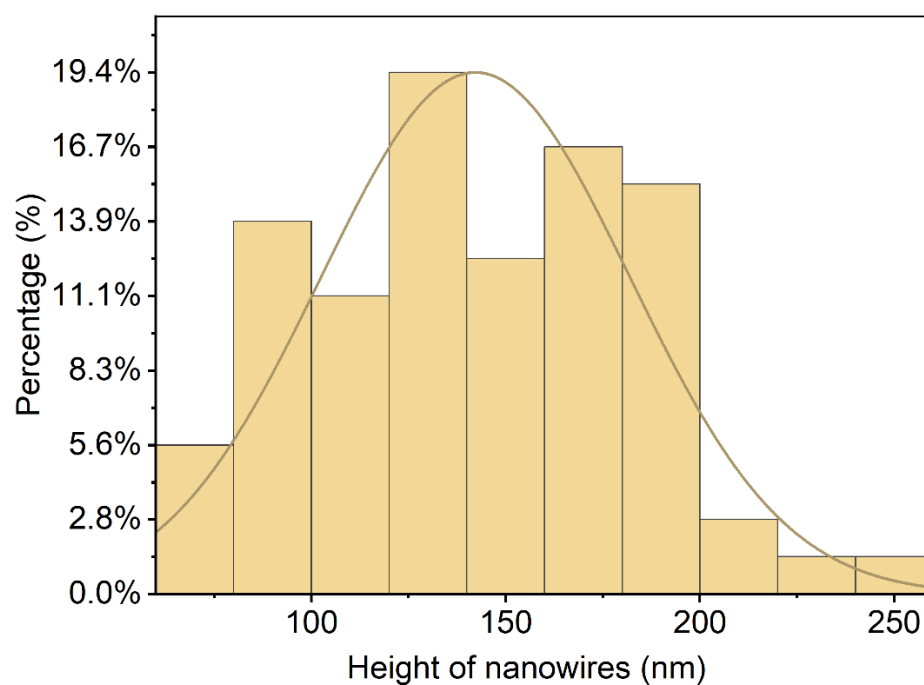**Figure S1.** The statistical data of the nanowire heights.

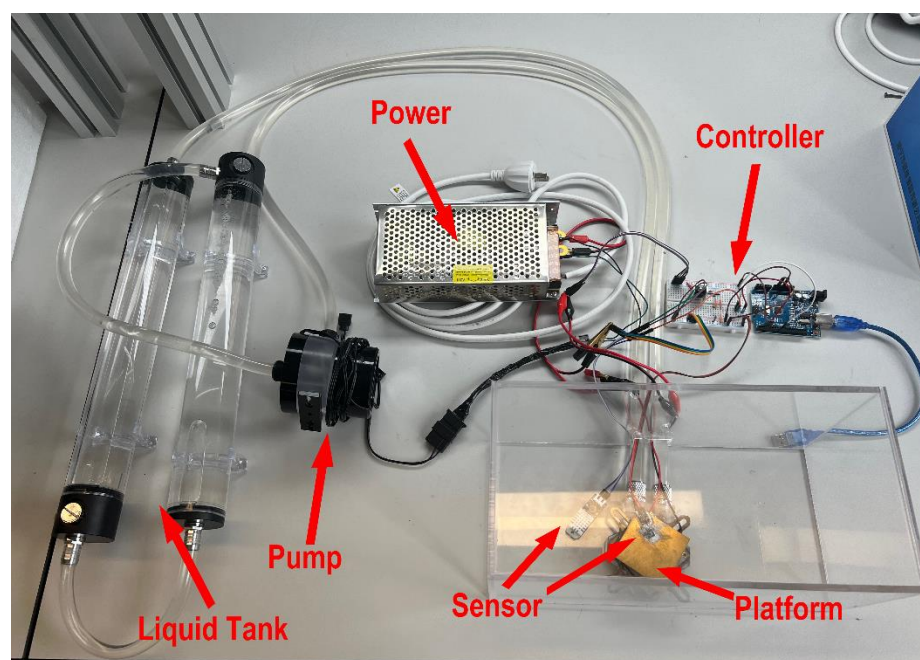

**Figure S2.** The anti-icing setup for measuring the ice delay time (IDT).

## References

1. Wang, C.; Huang, H.; Qian, Y.; Zhang, Z.; Yan, J. One-step fabrication of regular hierarchical micro/nano-structures on glassy carbon by nanosecond pulsed laser irradiation. *Journal of Manufacturing Processes* **2021**, *62*, 108–118, doi:10.1016/j.jmapro.2020.12.043.
2. Lu, J.; Yang, J.; Singh, S.C.; Zhan, Z.; Yu, Z.; Xin, W.; Huang, T.; Guo, C. Hierarchical micro/nanostructured TiO<sub>2</sub>/Ag substrates based on femtosecond laser structuring: A facile route for enhanced SERS performance and location predictability. *Applied Surface Science* **2019**, *478*, 737–743, doi:10.1016/j.apsusc.2019.01.257.
3. Wang, C.; Shao, J.; Lai, D.; Tian, H.; Li, X. Suspended-Template Electric-Assisted Nanoimprinting for Hierarchical Micro-Nanostructures on a Fragile Substrate. *ACS Nano* **2019**, *13*, 10333–10342, doi:10.1021/acsnano.9b04031.
4. Lim, C.H.; Han, S.Y.; Eo, J.D.; Kim, K.; Kim, W.B. Superhydrophobic hierarchical structures produced through novel low-cost stamp fabrication and hot embossing of thermoplastic film. *Journal of Mechanical Science and Technology* **2015**, *29*, 5107–5111, doi:10.1007/s12206-015-1108-8.
5. Choi, I.; Kim, Y.; Yi, J. Fabrication of hierarchical micro/nanostructures via scanning probe lithography and wet chemical etching. *Ultramicroscopy* **2008**, *108*, 1205–1209, doi:10.1016/j.ultramic.2008.04.076.
6. Zhang, L.; Uzoma, P.C.; Xiaoyang, C.; Penkov, O.V.; Hu, H. Bio-Inspired Hierarchical Micro/Nanostructured Surfaces for Superhydrophobic and Anti-Ice Applications. *Front Bioeng Biotechnol* **2022**, *10*, 872268, doi:10.3389/fbioe.2022.872268.
